# Supplementary material for: An anionic and cationic surfactant-assisted hydrothermal synthesis of cobalt oxide nanoparticles as the active electrode material for supercapacitors
Source: Royal Society of Chemistry journal article supplement (doi:10.1039/d0nj05088a), 2021-01-01
Supplement: d0nj05088a1.pdf [file d0nj05088a1.pdf]

**Manuscript ID: NJ-ART-10-2020-005088**

**Supplementary Information**

**Anionic and Cationic Surfactants-Assisted Hydrothermal Synthesis of Cobalt Oxide  
Nanoparticles as The Active Electrode Material for Supercapacitor**

R. Samal, <sup>a, b</sup> Aneeya K. Samantara, <sup>c, d</sup> S. Mahalik, <sup>a, b</sup> J. N. Behera, <sup>c, d\*</sup> B. Dash, <sup>a, b\*</sup> K. Sanjay  
<sub>a, b</sub>

<sup>a</sup>Academy of Scientific and Innovative Research, New Delhi, India

<sup>b</sup>Hydro and Electrometallurgy Department, CSIR- Institute of Minerals and Materials Technology,  
Bhubaneswar - 751013, Odisha

<sup>c</sup>National Institute of Science Education and Research (NISER), Khordha 752050, Odisha,  
India.

<sup>d</sup>Homi Bhabha National Institute, (HBNI), Mumbai, India.

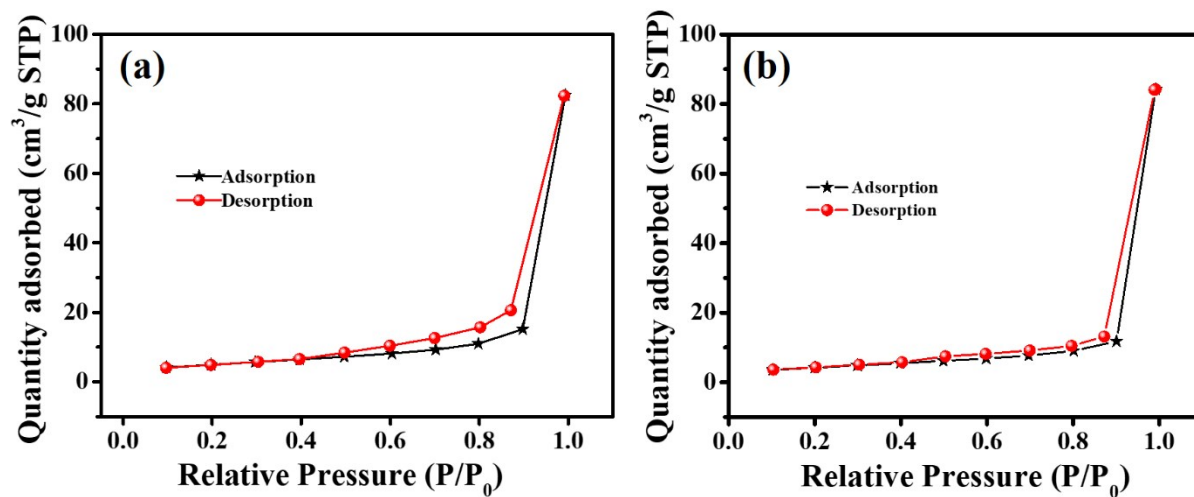

**Fig. S 1** Nitrogen desorption/adsorption isotherm for the (a) CTAB-500 °C and SLS-500°C samples

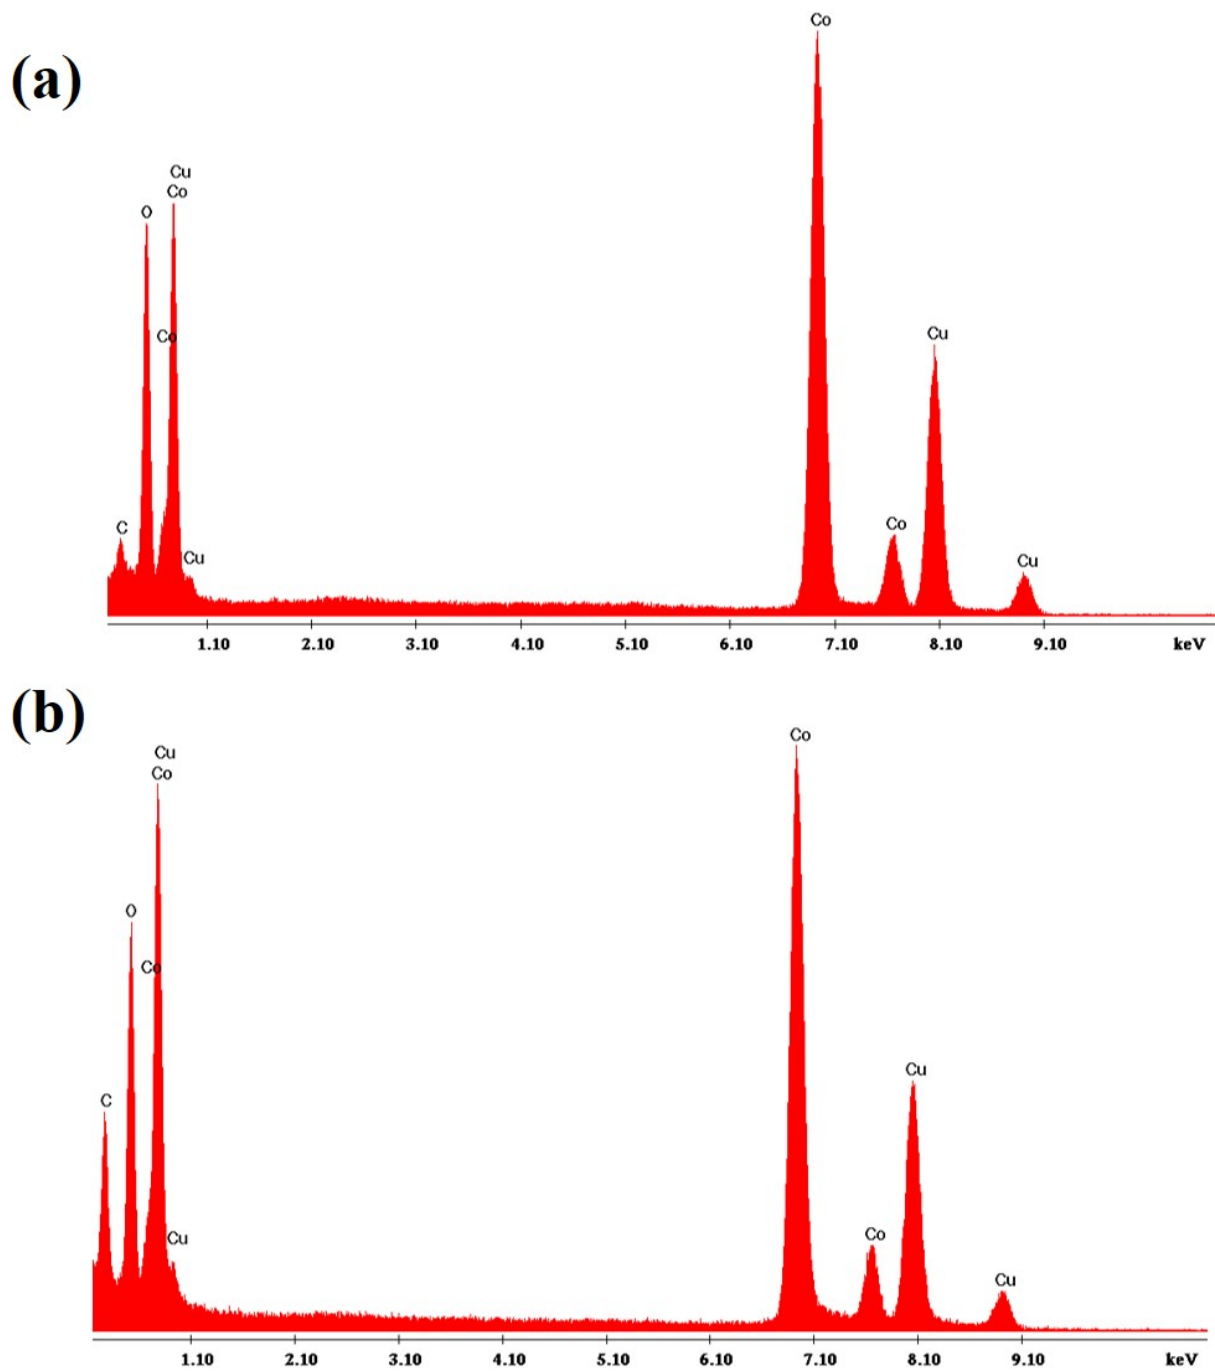

**Fig. S 2** EDS spectrum of (a) CTAB-500 °C and (b) SLS-500 °C.

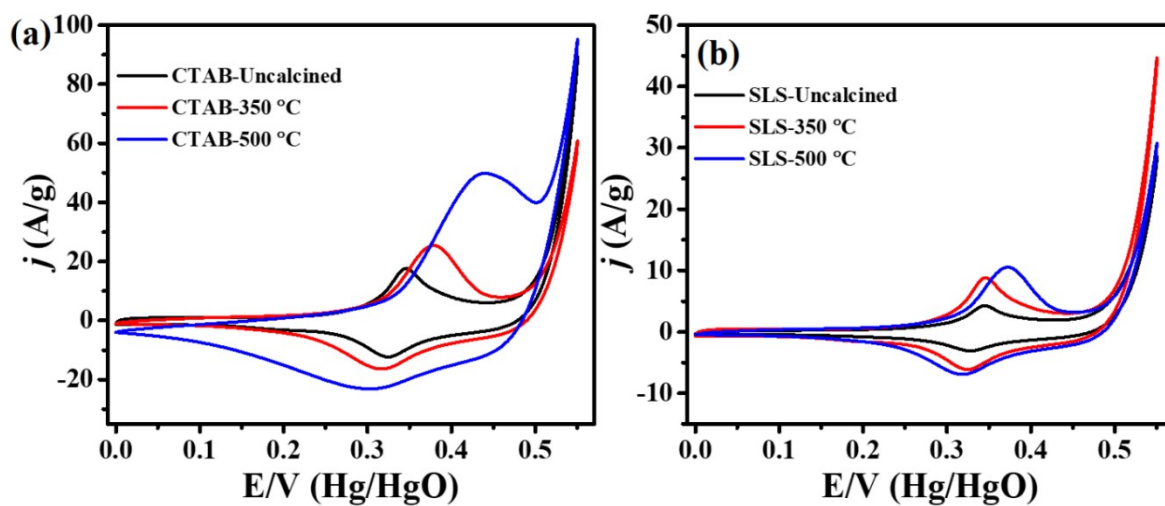

**Fig. S 3** (a) Cyclic voltammograms of (a) CTAB-Uncalcined, CTAB-350 °C, and CTAB-500 °C and (b) SLS-Uncalcined, CTAB-350 °C and SLS-500 °C and (b) cyclic stability of CTAB-500 °C.

| <b>Morphology</b>                                                 | <b>Broad classification</b> | <b>F g<sup>-1</sup></b> | <b>References</b> |
|-------------------------------------------------------------------|-----------------------------|-------------------------|-------------------|
| Co <sub>3</sub> O <sub>4</sub> nanocube                           | 3D                          | 350                     | 1                 |
| nickel–cobalt-based binary metal phosphide (NiCoP) hollow spheres | 3D                          | 960                     | 2                 |
| Layered Co <sub>3</sub> O <sub>4</sub> flakes                     | 2D                          | 263                     | 3                 |
| nanosheets (Co <sub>3</sub> O <sub>4</sub> /rGONS)                | 2D                          | 400                     | 4                 |
| Co <sub>3</sub> O <sub>4</sub> Nanosheets                         | 2D                          | 693                     | 5                 |
| Co <sub>3</sub> O <sub>4</sub> Nanorods                           | 1D                          | 281                     | 6                 |

**Table S1** Different structures with capacitance

### References:

1. X. Liu, Q. Long, C. Jiang, B. Zhan, C. Li, S. Liu, Q. Zhao, W. Huang and X. Dong, *Nanoscale*, 2013, **5**, 6525-6529.
2. U. Costantino, V. Bugatti, G. Gorrasi, F. Montanari, M. Nocchetti, L. Tammara, and V. Vittoria, *ACS Appl. Mat. Interfaces*, 2009, **1**, 668.
3. L. Xie, K. Li, G. Sun, Z. Hu, C. Lv, J. Wang, C. Zhang, *Journal of Solid State Electrochemistry*, 2012, **17**, 55-61.
4. Z. Song, Y. Zhang, W. Liu, S. Zhang, G. Liu, H. Chen, J. Qiu, *Electrochimica Acta*, 2013, **112**, 120-126.
5. C. Zhao, X. Wang, S. Wang, Y. Wang, Y. Zhao, W. Zheng, *International Journal of Hydrogen Energy*, 2012, **37**, 11846-11852.
6. G. Wang, X. Shen, J. Horvat, B. Wang, H. Liu, D. Wexler, J. Yao, *The Journal of Physical Chemistry C*, 2009, **113**, 4357-4361.
